# Supplementary material for: Roughening of windmill-shaped spinel Co3O4microcrystals grown on a flexible metal substrate by a facile surface treatment to enhance their performance in the oxidation of water
Source: Royal Society of Chemistry journal article supplement (doi:10.1039/c4ra07082h), 2014-08-14
Supplement: c4ra07082h1.pdf [file c4ra07082h1.pdf]

## **Electronic Supplementary Information**

**Roughening of Windmill-Shaped Spinel  $\text{Co}_3\text{O}_4$  Microcrystals Grown on a Flexible Metal Substrate by a Facile Surface Treatment for Enhanced Water Oxidation Performance**

Lu Zhang, Wanhong He, Xu Xiang\*, Ying Li, Feng Li

## Figures

**Fig. S1** XRD pattern of  $\text{Co}_3\text{O}_4$ -NW grown on a Ni foil (triangle: reflections from Ni)

**Fig. S2** Digital photos of bare substrate,  $\text{Co}_3\text{O}_4$ ,  $\text{Co}_3\text{O}_4$ -3, and  $\text{Co}_3\text{O}_4$ -NW electrodes (from left to right)

**Fig. S3** Energy-dispersive X-ray spectra of substrate (left) and  $\text{Co}_3\text{O}_4$  (right) grown on the substrate

**Fig. S4** Linear sweep voltammetry (LSV) curves of  $\text{Co}_3\text{O}_4$  electrodes treated with different amount of solute (tested in 0.1 M KOH):  $\text{Co}_3\text{O}_4$ -05 (0.5wt%),  $\text{Co}_3\text{O}_4$ -2 (2wt%),  $\text{Co}_3\text{O}_4$ -3 (3wt%).

**Fig. S5** Linear dependence of the peak current of the  $\text{Co}^{3+}/\text{Co}^{2+}$  oxidation wave with the square root of scan rate (A)  $\text{Co}_3\text{O}_4$ , (B)  $\text{Co}_3\text{O}_4$ -1, (C)  $\text{Co}_3\text{O}_4$ -3, (D)  $\text{Co}_3\text{O}_4$ -5 (tested in 0.1 M KOH)

**Fig. S6** Tafel plots of  $\text{Co}_3\text{O}_4$  electrodes. The Tafel slopes were derived by fitting data in the linear part of the plots.

**Fig. S7** Linear relationship of the peak current density of  $\text{Co}^{3+}/\text{Co}^{2+}$  oxidation wave with the scan rate (A)  $\text{Co}_3\text{O}_4$ , (B)  $\text{Co}_3\text{O}_4$ -1, (C)  $\text{Co}_3\text{O}_4$ -3, (D)  $\text{Co}_3\text{O}_4$ -5 (tested in 0.1 M KOH)

**Fig. S8**  $\text{O}_2$  evolution measurements from the  $\text{Co}_3\text{O}_4$ -3 electrode using an  $\text{O}_2$  probe method (1.64 V vs RHE)

**Fig. S9** SEM images of  $\text{Co}_3\text{O}_4$  samples after 12 hr OER operation (1.58 V, 0.1 M KOH). (A)  $\text{Co}_3\text{O}_4$ , (B)  $\text{Co}_3\text{O}_4$ -1, (C)  $\text{Co}_3\text{O}_4$ -5

**Fig. S10** XRD pattern of  $\text{Co}_3\text{O}_4$ -3 electrocatalyst before OER (a) and after 12 hr OER operation (b) (triangle: reflections from Ni)

**Fig. S11** LSV curves of  $\text{Co}_3\text{O}_4$ -3 electrocatalyst before OER (black) and after 12 hr OER operation (red) (0.1 M KOH, 1.58 V vs RHE)

## Tables

**Table S1** Elemental analysis of the substrate and  $\text{Co}_3\text{O}_4$  sample measured by EDS

**Table S2** Elemental analysis of  $\text{Co}_3\text{O}_4$ -3 sample measured by EDS instrument attached to TEM

**Table S3** Comparison of  $\text{Co}_3\text{O}_4$  electrocatalysts on a substrate based on a mass activity

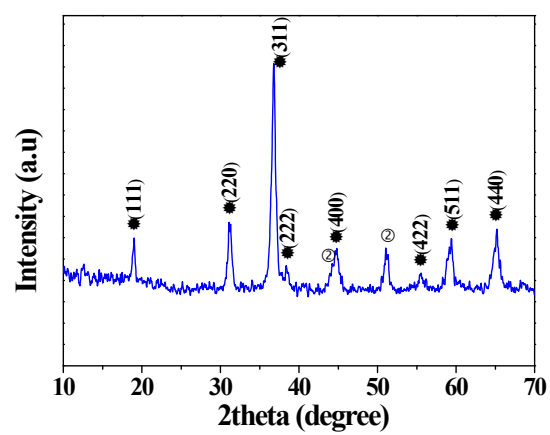

**Fig. S1** XRD pattern of  $\text{Co}_3\text{O}_4$ -NW grown on a Ni foil (triangle: reflections from Ni)

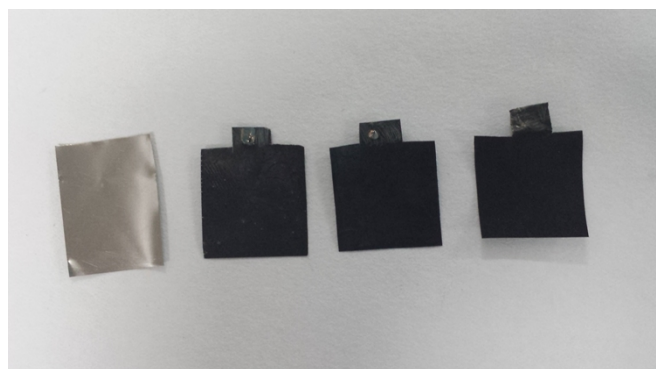

**Fig. S2** Digital photos of bare substrate,  $\text{Co}_3\text{O}_4$ ,  $\text{Co}_3\text{O}_4$ -3, and  $\text{Co}_3\text{O}_4$ -NW electrodes

(from left to right)

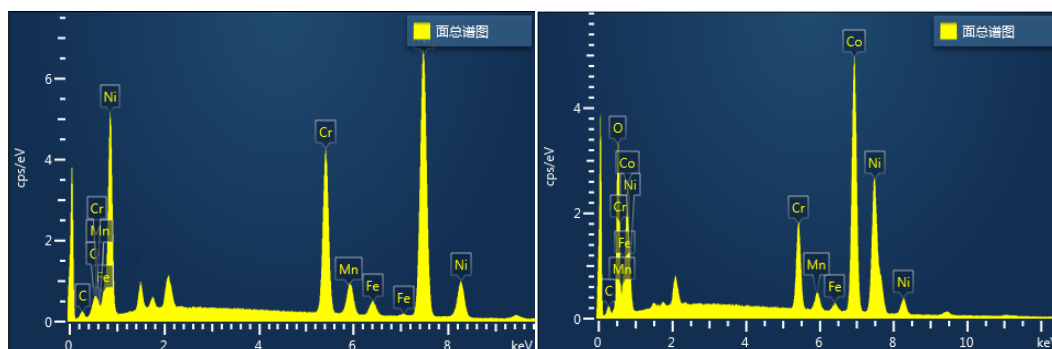

**Fig. S3** Energy-dispersive X-ray spectra of substrate (left) and  $\text{Co}_3\text{O}_4$  (right) grown on the substrate

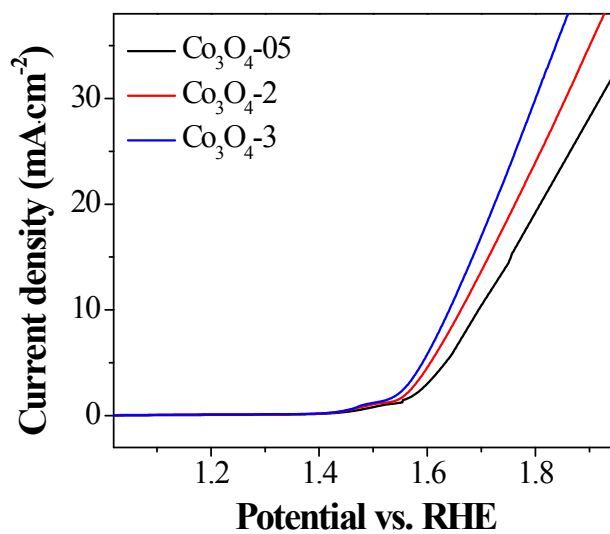

**Fig. S4** Linear sweep voltammetry (LSV) curves of  $\text{Co}_3\text{O}_4$  electrodes treated with different amount of solute (tested in 0.1 M KOH):  $\text{Co}_3\text{O}_4$ -05 (0.5wt%),  $\text{Co}_3\text{O}_4$ -2 (2wt%),  $\text{Co}_3\text{O}_4$ -3 (3wt%).

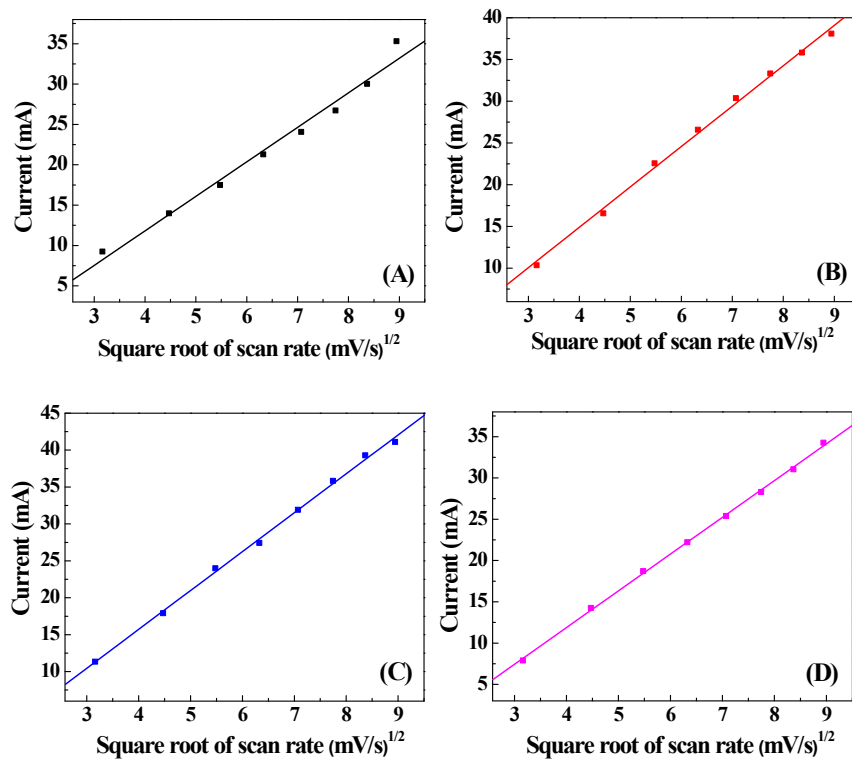

**Fig. S5** Linear dependence of the peak current of the  $\text{Co}^{3+}/\text{Co}^{2+}$  oxidation wave with the square root of scan rate (A)  $\text{Co}_3\text{O}_4$ , (B)  $\text{Co}_3\text{O}_4\text{-1}$ , (C)  $\text{Co}_3\text{O}_4\text{-3}$ , (D)  $\text{Co}_3\text{O}_4\text{-5}$  (tested in 0.1 M KOH)

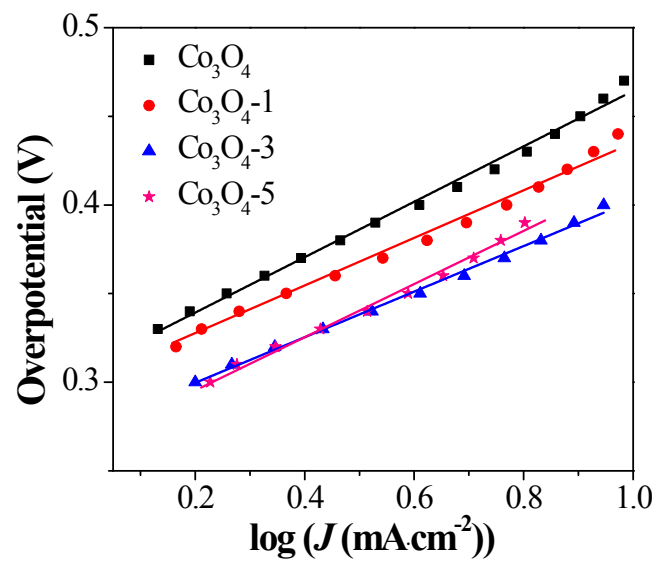

**Fig. S6** Tafel plots of  $\text{Co}_3\text{O}_4$  electrodes. The Tafel slopes were derived by fitting data in the linear part of the plots.

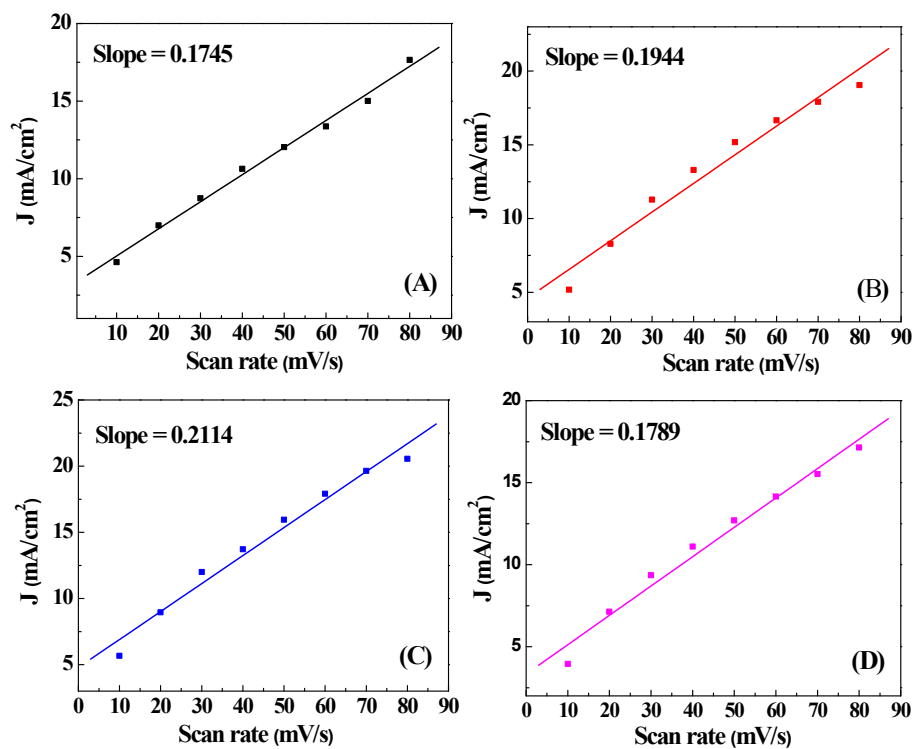

**Fig. S7** Linear relationship of the peak current density of  $\text{Co}^{3+}/\text{Co}^{2+}$  oxidation wave with the scan rate (A)  $\text{Co}_3\text{O}_4$ , (B)  $\text{Co}_3\text{O}_4\text{-1}$ , (C)  $\text{Co}_3\text{O}_4\text{-3}$ , (D)  $\text{Co}_3\text{O}_4\text{-5}$  (tested in 0.1 M KOH)

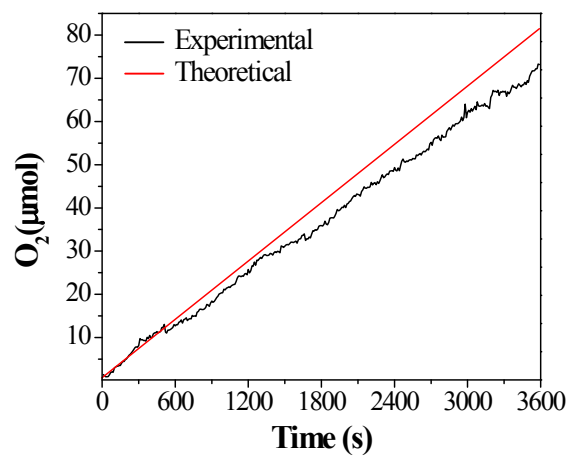

**Fig. S8** O<sub>2</sub> evolution measurements from the Co<sub>3</sub>O<sub>4</sub>-3 electrode using an O<sub>2</sub> probe method (at 1.64 V vs RHE)

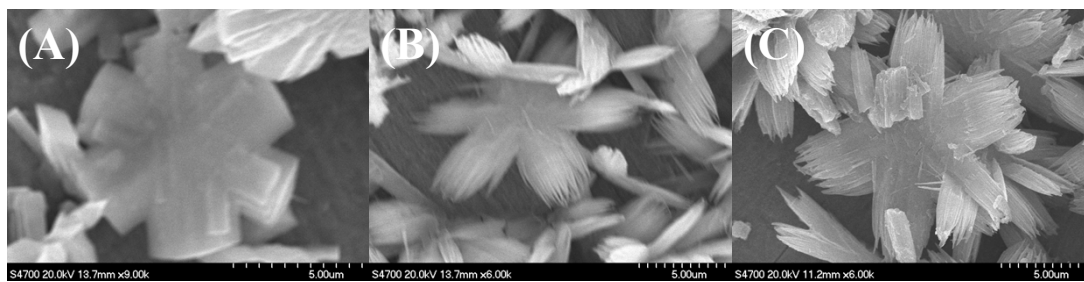

**Fig. S9** SEM images of Co<sub>3</sub>O<sub>4</sub> samples after 12 hr OER operation (1.58 V, 0.1 M KOH). (A) Co<sub>3</sub>O<sub>4</sub>, (B) Co<sub>3</sub>O<sub>4</sub>-1, (C) Co<sub>3</sub>O<sub>4</sub>-5

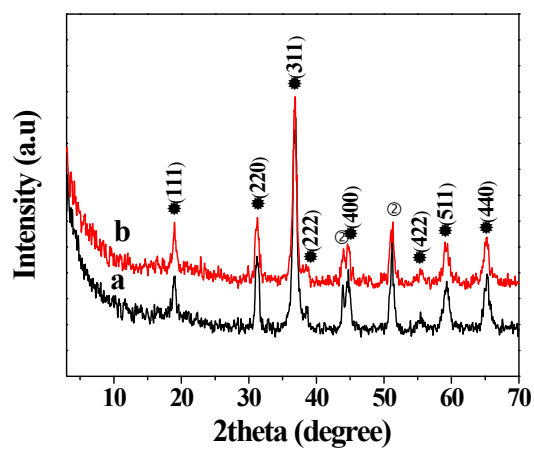

**Fig. S10** XRD pattern of Co<sub>3</sub>O<sub>4</sub>-3 electrocatalyst before OER (a) and after 12 hr OER operation (b) (triangle: reflections from Ni)

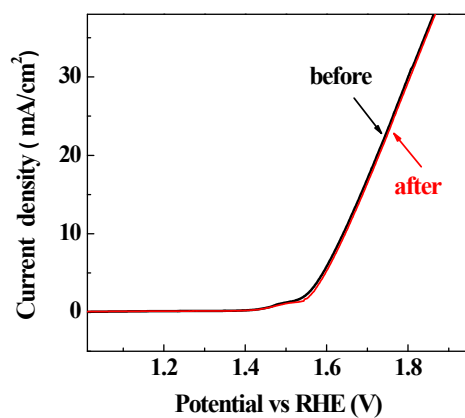

**Fig. S11** LSV curves of Co<sub>3</sub>O<sub>4</sub>-3 electrocatalyst before OER (black) and after 12 hr OER operation (red) (1.58 V vs RHE, 0.1 M KOH)

## Tables

**Table S1** Elemental analysis of the substrate and Co<sub>3</sub>O<sub>4</sub> sample measured by EDS

| Element | wt%       |                                |
|---------|-----------|--------------------------------|
|         | Substrate | Co <sub>3</sub> O <sub>4</sub> |
| Co      | /         | 46.82                          |
| Ni      | 73.21     | 27.98                          |
| Cr      | 21.10     | 8.40                           |
| Mn      | 1.90      | 0.83                           |
| Fe      | 2.31      | 1.02                           |
| O       | 1.48      | 14.95                          |
| Total   | 100       | 100                            |

**Table S2** Elemental analysis of Co<sub>3</sub>O<sub>4</sub>-3 sample measured by EDS instrument

| attached to TEM |       |       |
|-----------------|-------|-------|
| Element         | at%   | wt%   |
| Co              | 21.18 | 49.38 |
| O               | 78.35 | 49.60 |
| Ni              | 0.08  | 0.18  |
| Cr              | 0.17  | 0.36  |
| Mn              | 0.17  | 0.36  |
| Fe              | 0.05  | 0.12  |
| Total           | 100   | 100   |

**Table S3** Comparison of Co<sub>3</sub>O<sub>4</sub> electrocatalysts on a substrate

based on a mass activity

| Catalyst                                                             | Co <sub>3</sub> O <sub>4</sub> | Co <sub>3</sub> O <sub>4</sub> -1 | Co <sub>3</sub> O <sub>4</sub> -3 | Co <sub>3</sub> O <sub>4</sub> -5 | Co <sub>3</sub> O <sub>4</sub> -NW |
|----------------------------------------------------------------------|--------------------------------|-----------------------------------|-----------------------------------|-----------------------------------|------------------------------------|
| <b>Mass (mg) <sup>a</sup></b>                                        | 3.0                            | 3.1                               | 3.1                               | 3.2                               | 3.5                                |
| <b>Mass activity<br/>@<math>\eta</math>= 400mV (A/g)<sup>b</sup></b> | 2.7                            | 3.8                               | 5.7                               | 4.3                               | 4.1                                |
| <b>Mass activity<br/>@<math>\eta</math>= 500mV (A/g)</b>             | 8.0                            | 9.7                               | 13                                | 8.2                               | 9.6                                |

<sup>a</sup> The mass was calculated by weighing the foil before and after the growth of Co<sub>3</sub>O<sub>4</sub>.

<sup>b</sup> The current values at a certain overpotential were obtained from LSV curves tested in 0.1 M

KOH solution.
